# Supplementary material
Source: PubMed Central journal article supplement (PMC3387103)
Supplement: 1207230109_pnas.201207230SI.pdf [file 1207230109_pnas.201207230SI.pdf]

# Supporting Information

Khazaie et al. 10.1073/pnas.1207230109

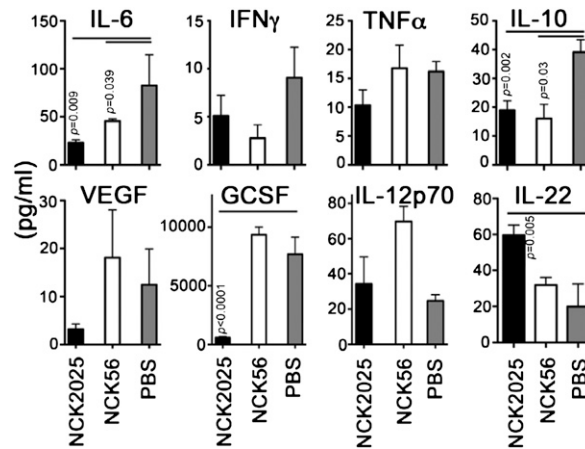

**Fig. S1.** Impact of treatment of TS4Cre  $\times$  cAPC<sup>lox468</sup> mice by *Lactobacillus acidophilus* strains on serum cytokine levels. Multiplex ELISA was conducted according to the manufacturer's instructions (Millipore) on filtered (0.22  $\mu$ m) serum. Results were acquired with a Luminex 100 instrument and analyzed by using xPONENT software (Luminex). Data are listed in the following order: NCK2025/NCK56/PBS solution. IL-6, 23.16  $\pm$  3.03/45.60  $\pm$  2.21/82.72  $\pm$  32.06 ( $P = 0.039$ , NCK2025 vs. PBS solution;  $P = 0.009$ , NCK2025 vs. NCK56); IFN- $\gamma$ , 5.11  $\pm$  2.13/2.79  $\pm$  1.39/9.08  $\pm$  3.17; TNF- $\alpha$ , 10.33  $\pm$  2.66/16.79  $\pm$  4.02/16.19  $\pm$  1.77; IL-10, 18.95  $\pm$  9.5/16.07  $\pm$  4.89/39.14  $\pm$  4.31 ( $P = 0.002$ , NCK2025 vs. PBS solution;  $P = 0.03$ , NCK56 vs. PBS solution); VEGF, 3.19  $\pm$  1.13/18.11  $\pm$  9.98/12.46  $\pm$  7.42 ( $P = 0.008$ , NCK2025 vs. NCK56); G-CSF, 573.3  $\pm$  109.1/9361  $\pm$  638.8/7689  $\pm$  1436 ( $P < 0.0001$ , NCK2025 vs. PBS solution and NCK56); IL-12p70, 34.15  $\pm$  15.46/69.76  $\pm$  8.60/24.64  $\pm$  3.50 ( $P = 0.001$ , NCK56 vs. PBS solution); IL-22, 59.57  $\pm$  5.65/31.85  $\pm$  4.18/19.89  $\pm$  12.60 ( $P = 0.005$ , NCK2025 vs. PBS solution).  $P$  values given when statistical significance was achieved. Serum from mice ( $n = 5$  per group) treated with PBS solution, NCK56, and NCK2025 were tested in duplicate. Data are representative of two independent experiments.
